# Supplementary material for: Tuning the fluorescence performance of carbon dots with a reduction pathway
Source: Royal Society of Chemistry journal article supplement (doi:10.1039/c8nr09587f), 2019-01-01
Supplement: c8nr09587f1.pdf [file c8nr09587f1.pdf]

**ESI**

**Tuning the Fluorescence Performance of Carbon Dots with a  
Reduction Pathway**

*Dongjun Shen, Yijuan Long, Jie Wang, Yuanyuan Yu, Jiangli Pi, Lili Yang, Huzhi  
Zheng\**

Key Laboratory on Luminescence and Real-Time Analysis, Ministry of Education,  
College of Chemistry and Chemical Engineering, Southwest University, Chongqing  
400715, P. R. China

---

\*Corresponding author. Tel: +86 23 68252360. Fax: +86 23 68254000. E-mail:

[zhenghz@swu.edu.cn](mailto:zhenghz@swu.edu.cn) (H. Zheng)

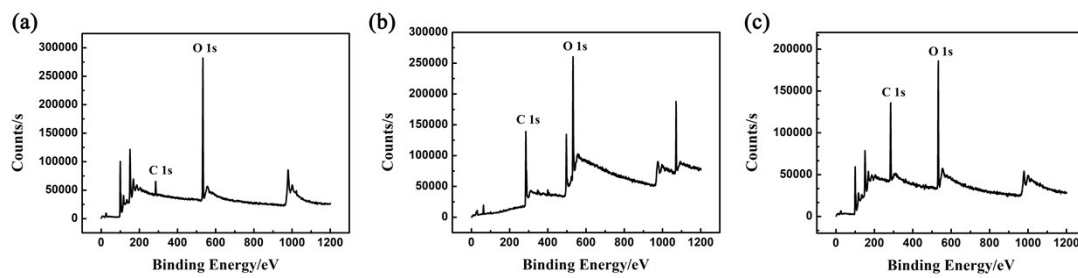

**Fig. S1.** XPS patterns of (a) o-CDs, (b) r-CD1s, and (c) r-CD2s

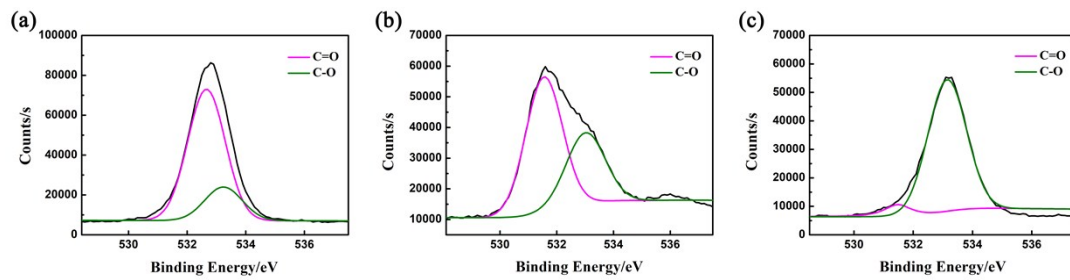

**Fig. S2.** XPS patterns (O 1s spectra) of (a) o-CDs, (b) r-CD1s, and (c) r-CD2s

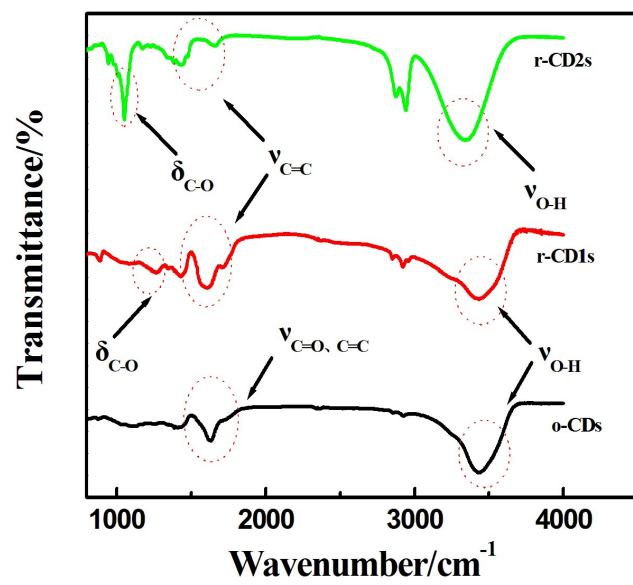

Fig. S3. FT-IR spectra of o-CDs, r-CD1s, and r-CD2s

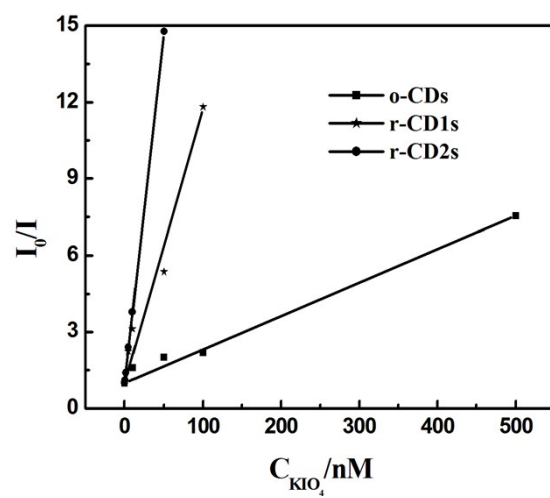

**Fig. S4.** Quenching effects of  $KIO_4$  on o-CDs, r-CD1s, and r-CD2s

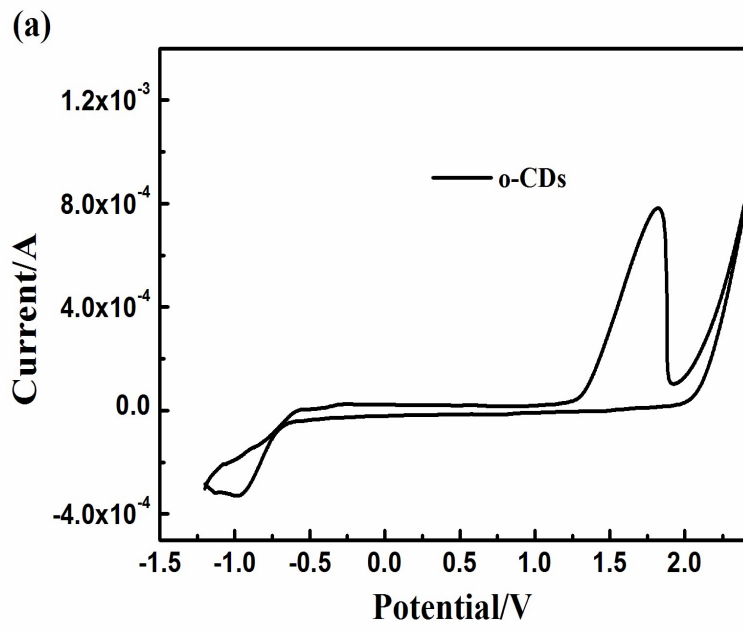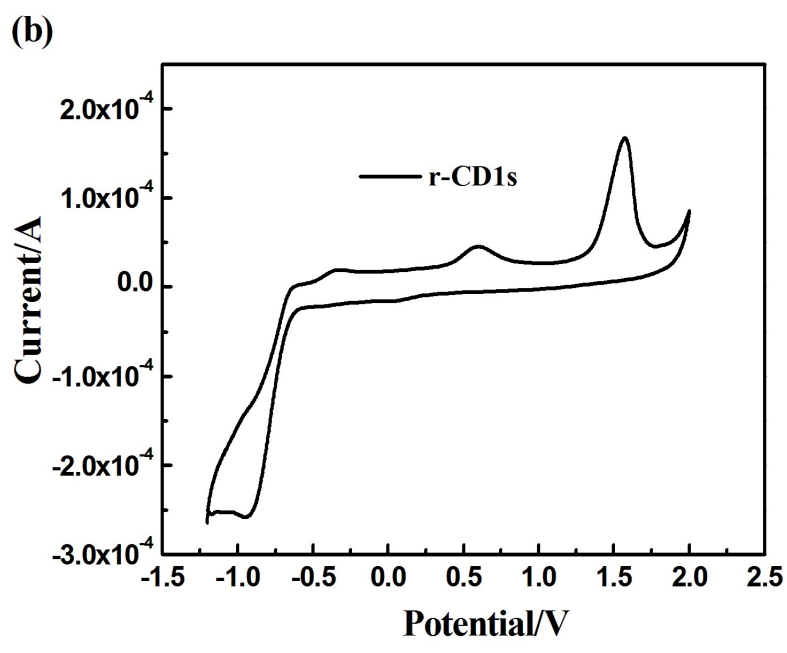

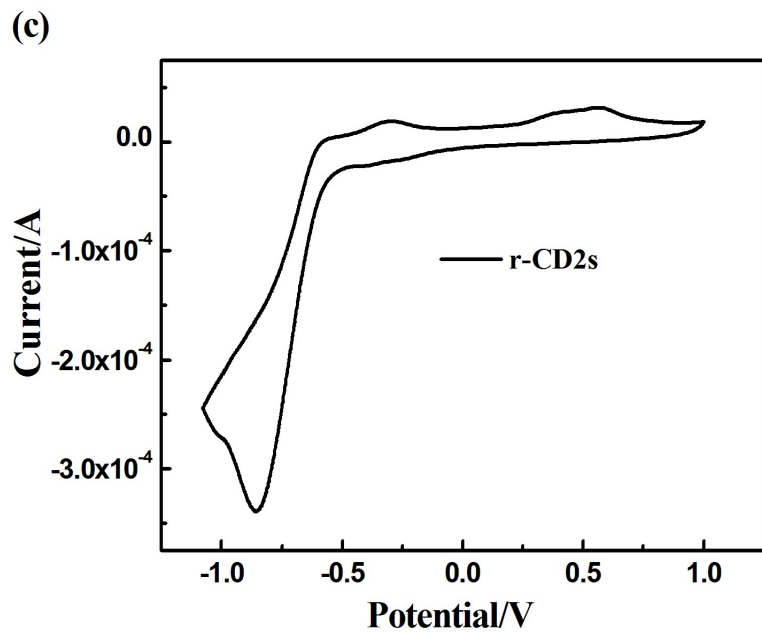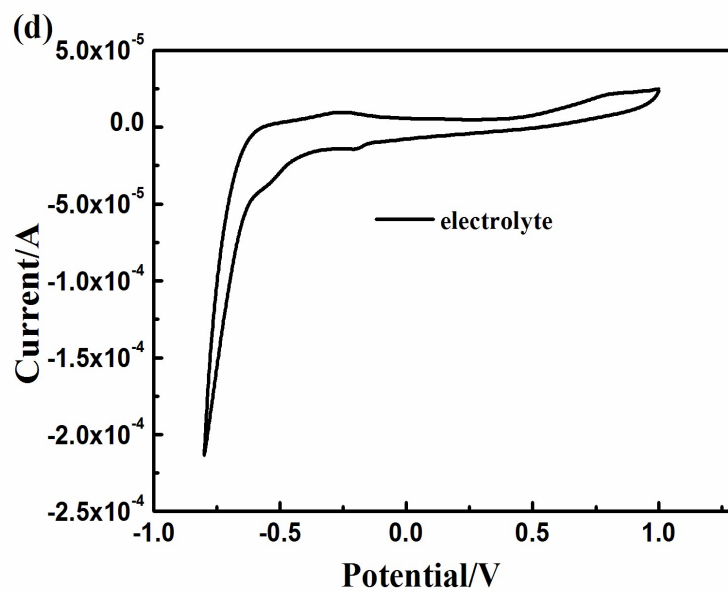

Fig. S5. CVs of (a) o-CDs, (b) r-CD1s, (c) r-CD2s, and (d) the electrolyte

**Table S1.** Fluorescent characteristics of o-CDs, r-CD1s, and r-CD2s prepared with graphite oxide and candle soot.

| Precursors of CDs | Emission of o-CDs | Emission of r-CD1s | Emission of r-CD2s | QY of o-CDs | QY of r-CD1s | QY of r-CD2s |
|-------------------|-------------------|--------------------|--------------------|-------------|--------------|--------------|
| Graphite oxide    | 510 nm            | 450 nm             | 385 nm             | 1.3%        | 11.7%        | 15.2%        |
| Candle soot       | 525 nm            | 465 nm             | 365 nm             | 0.95%       | 7.0%         | 9.1%         |

The carbon dots were prepared by treating graphite oxide or candle soot under reflux in nitric acid according to previous reports<sup>S1, 2</sup>.



**Table S2.** Response equations of the o-CDs, r-CD1s, and r-CD2s for KIO<sub>4</sub>

| Samples | Linear equation              | R     |
|---------|------------------------------|-------|
| o-CDs   | $y = 1.31 \times 10^7 x + 1$ | 0.994 |
| r-CD1s  | $y = 1.05 \times 10^8 x + 1$ | 0.988 |
| r-CD2s  | $y = 2.75 \times 10^8 x + 1$ | 0.999 |

## Reference

- S1. Q. L. Wang, H. Z. Zheng, Y. J. Long, L. Y. Zhang, M. Gao, W. J. Bai, Microwave-hydrothermal synthesis of fluorescent carbon dots from graphite oxide. *Carbon*, 2011, 49, 3134-3140.
- S2. X. J. Mao, H. Z. Zheng, Y. J. Long, J. Du, J. Y. Hao, L. L. Wang, D. B. Zhou, Study on the fluorescence characteristics of carbon dots. *Spectrochim. Acta A*, 2010, 75, 553-557.
